# Supplementary material
Source: PubMed Central journal article supplement (PMC4010974)

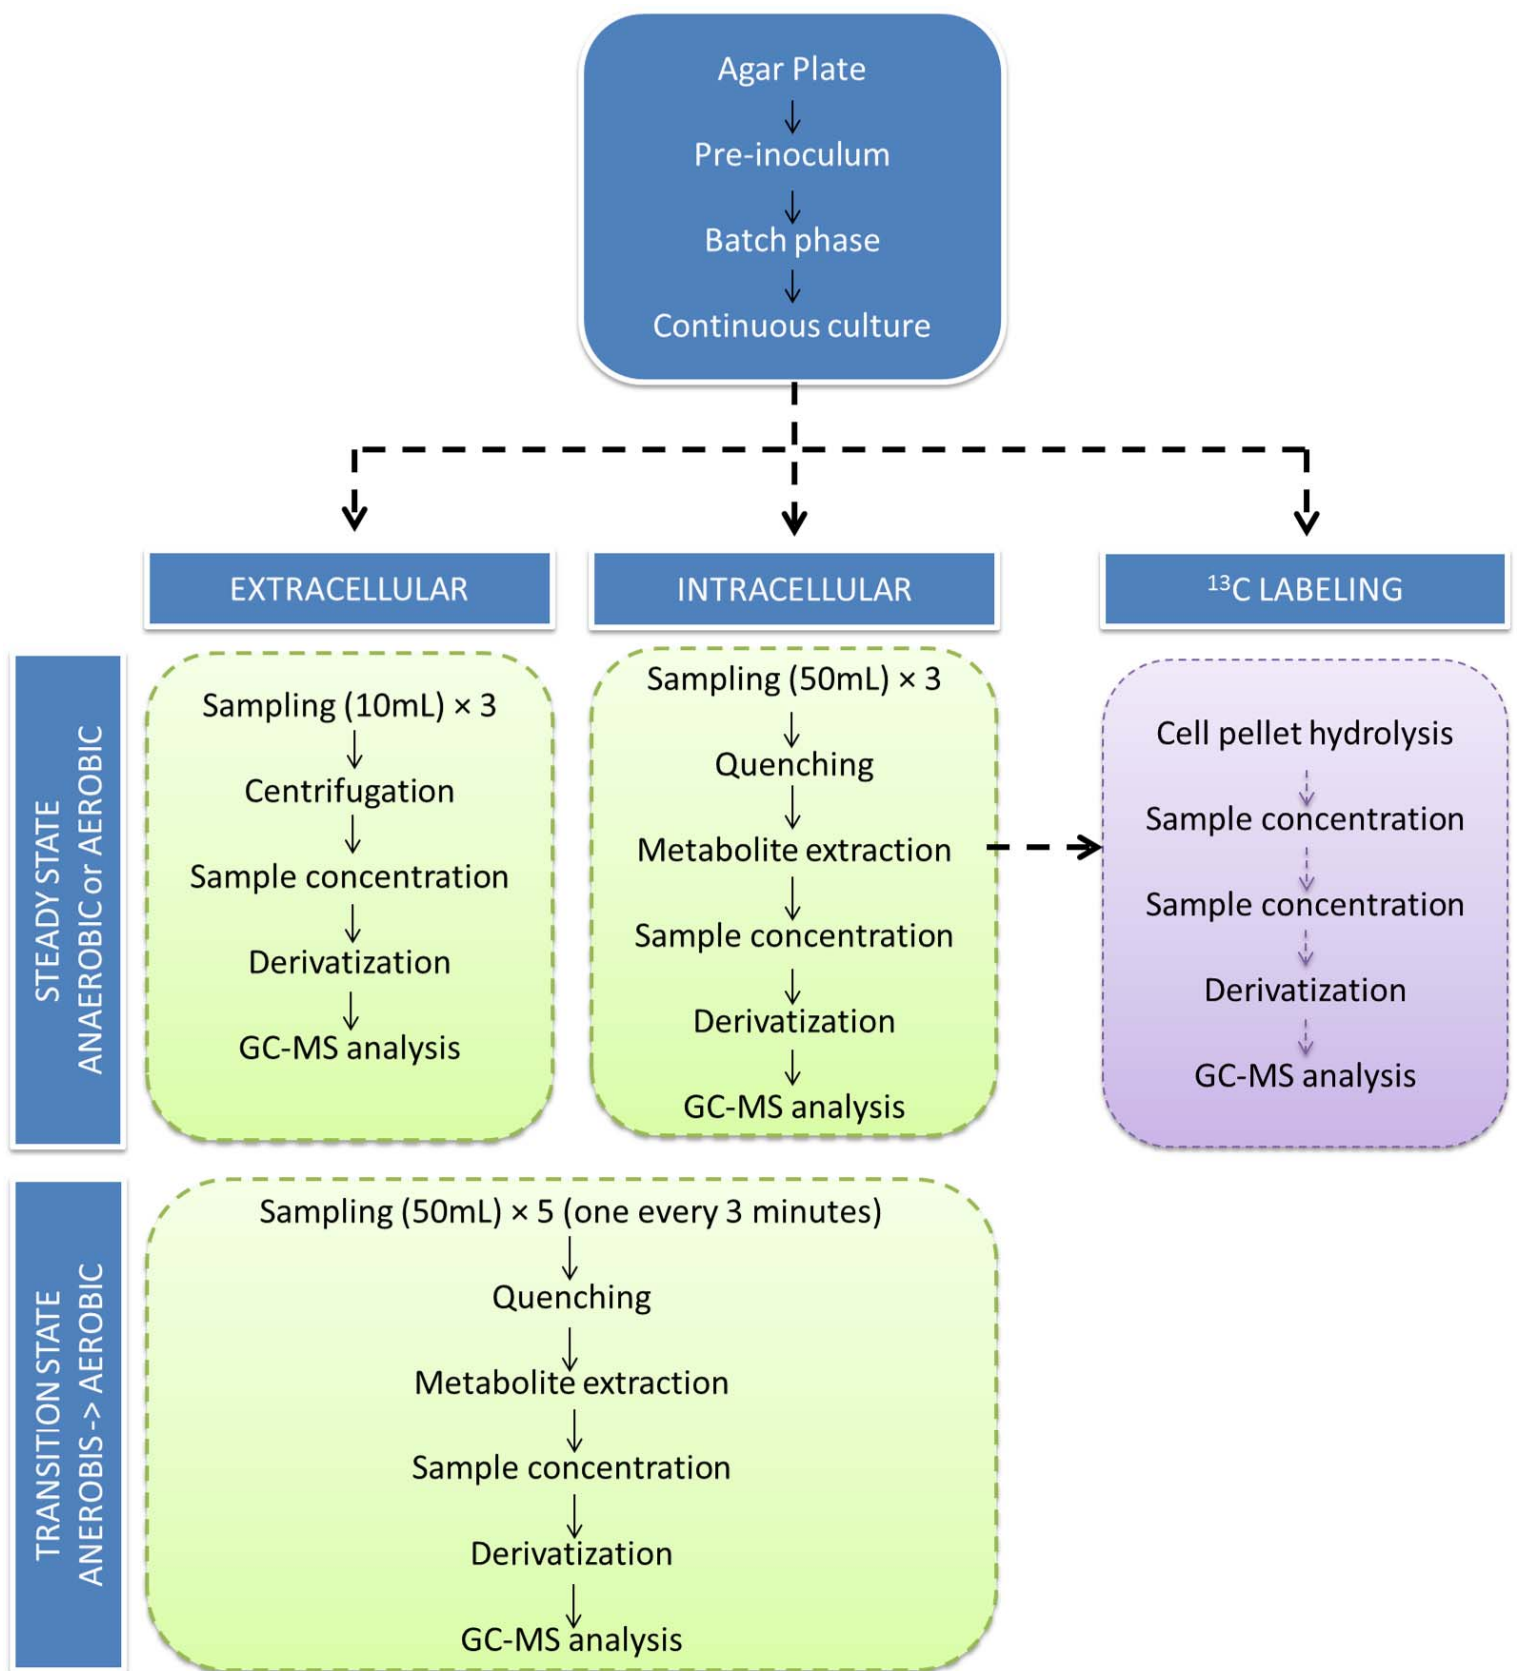

**S1.** Diagram of the experimental procedure and sampling points.

Supplement: JB.01354-13_zjb999093157so1.pdf [file JB.01354-13_zjb999093157so1.pdf]
